# Supplementary material
Source: HighWire-hosted journal article supplement (https://erj.ersjournals.com/content/58/1/2100183)
Supplement: inline-supplementary-material-1 [file inline-supplementary-material-1.pdf]

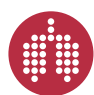

# Antibiotics for asthma attacks: masking uncertainty

SHAREABLE PDF

Sanjay Ramakrishnan <sup>1,2</sup> and Simon Couillard <sup>1,3</sup>

<sup>1</sup>Respiratory Medicine Unit and Oxford Respiratory NIHR BRC, Nuffield Dept of Medicine, University of Oxford, Oxford, UK. <sup>2</sup>School of Medical and Health Sciences, Edith Cowan University, Perth, Australia. <sup>3</sup>Faculté de médecine et des sciences de la santé, Université de Sherbrooke, Sherbrooke, QC, Canada.

Corresponding author: Sanjay Ramakrishnan ([sanjay.ramakrishnan@ndm.ox.ac.uk](mailto:sanjay.ramakrishnan@ndm.ox.ac.uk))

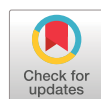

Shareable abstract (@ERSpublications)

**Despite current guidelines advising against, GPs commonly prescribe antibiotics with steroids for asthma attacks. The uncertainty caused by a symptom-based management paradigm probably drives this. A biology-guided management paradigm is needed.** <https://bit.ly/3iS3CCd>

**Cite this article as:** Ramakrishnan S, Couillard S. Antibiotics for asthma attacks: masking uncertainty. *Eur Respir J* 2021; 58: 2100183 [DOI: 10.1183/13993003.00183-2021].

This single-page version can be shared freely online.

Copyright ©The authors 2021. For reproduction rights and permissions contact [permissions@ersnet.org](mailto:permissions@ersnet.org)

Received: 20 Jan 2021  
Accepted: 21 Jan 2021

The role for antibiotics in acute asthma has been historically overestimated [1]. From a mechanistic point of view, multiplex PCR testing and conventional microbiological techniques show that >50–80% of events are associated with viral infections, and less than 20% associated with evidence of bacterial infection, with the remaining proportion presumed to be due to allergies and irritants [2]. Consequently, antibiotics are not expected to work in the context of most asthma attacks and their routine use is not recommended. This stance is supported by a Cochrane review, which found inconsistent data to support antimicrobial use [3] and a good quality retrospective cohort study, which associated the combination of antibiotics and oral corticosteroids (OCS) with a longer hospital length of stay, higher hospital cost, and similar risk of treatment failure compared to matched patients treated only with OCS alone [4].
